# Supplementary material
Source: HighWire-hosted journal article supplement (https://erj.ersjournals.com/content/54/4/1901623)
Supplement: inline-supplementary-material-1 [file inline-supplementary-material-1.pdf]

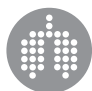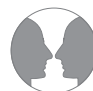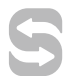

SHAREABLE PDF

# On the valid publication of names of mycobacteria

Enrico Tortoli 

**Affiliation:** Emerging Bacterial Pathogens Unit, IRCCS San Raffaele Scientific Institute, Milan, Italy.

**Correspondence:** Enrico Tortoli, Emerging Bacterial Pathogens Unit, IRCCS San Raffaele Scientific Institute, Via Olgettina 60, 20132, Milan, Italy. E-mail: [tortoli.enrico@hsr.it](mailto:tortoli.enrico@hsr.it)

 @ERSpublications

**The complex taxonomic rules do not affect the legitimacy of using the conventional nomenclature of mycobacteria based on the single genus *Mycobacterium*** <http://bit.ly/2L3mpKi>

**Cite this article as:** Tortoli E. On the valid publication of names of mycobacteria. *Eur Respir J* 2019; 54: 1901623 [<https://doi.org/10.1183/13993003.01623-2019>].

This single-page version can be shared freely online.

We are grateful to A. Oren and M.E. Trujillo for their precise clarifications. I admit that my knowledge about the complex rules governing the nomenclature of prokaryotes is very limited and dates back to no more than an year ago when, in reply to a manuscript of mine, a reviewer for the *International Journal of Systematic and Evolutionary Microbiology* invited me to read the papers of B.J. Tindall and co-workers [1, 2].
